# Supplementary material for: IDH mutation status is associated with a distinct hypoxia/angiogenesis transcriptome signature which is non-invasively predictable with rCBV imaging in human glioma
Source: PubMed Central journal article supplement (PMC4633672; doi:10.1038/srep16238), 2015-11-05

## Supplementary Data

***IDH*-mutation status is associated with a distinct hypoxia/angiogenesis transcriptome signature which is non-invasively predictable with rCBV-imaging in human glioma.**

Philipp Kickingereder MD<sup>1</sup>, Felix Sahm MD<sup>2,3</sup>, Alexander Radbruch MD<sup>1,6</sup>, Wolfgang Wick MD<sup>4,5</sup>, Sabine Heiland PhD<sup>1</sup>, Andreas von Deimling MD<sup>2,3</sup>, Martin Bendszus MD<sup>1</sup>, and Benedikt Wiestler MD<sup>1,4,5</sup>

*(1) Department of Neuroradiology, University of Heidelberg Medical Center, Heidelberg, Germany*

*(2) Department of Neuropathology, University of Heidelberg Medical Center, Heidelberg, Germany*

*(3) German Cancer Consortium (DKTK), Clinical Cooperation Unit Neuropathology, German Cancer Research Center (DKFZ), Heidelberg, Germany*

*(4) Neurology Clinic, University of Heidelberg Medical Center, Heidelberg, Germany*

*(5) DKTK, Clinical Cooperation Unit Neurooncology, DKFZ, Heidelberg, Germany*

*(6) DKFZ, Department of Radiology, Heidelberg, Germany*

**Supplementary Figure 1.** Gene expression heat-map of key *HIF1A* target genes showing increased expression of key angiogenic regulators such as *VEGFA*, *ANGPT* or *PDGF* in *IDH-1/2* wild-type tumors and on the contrary, increased expression of *Egln 1* and *3* – responsible for degradation of *HIF1A* – in *IDH-1/2* mutant tumors. Columns represent samples of 288 patients with low-grade diffuse or anaplastic gliomas from The Cancer Genome Atlas (TCGA). The statistical track at the bottom shows the logarithmic plot of p-values for each genomic position, with colored bars indicating either significantly increased expression of the genomic location for *IDH-1/2* wild-type (red) or mutant (blue) tumors.

**Supplementary Table 1.** Detailed information on histology and *IDH* mutation status from both TCGA and local dataset. (Excel file)

**Supplementary Table 2.** Gene sets evaluated for differential mRNA-expression between *IDH-1/2* mutated and wild-type tumors in the gene set variation analysis (GSVA). (Excel file)

**Supplementary Table 3.** Ingenuity pathway analysis of upstream regulators and downstream biological functions. (Excel file)

Supplementary Figure 1.

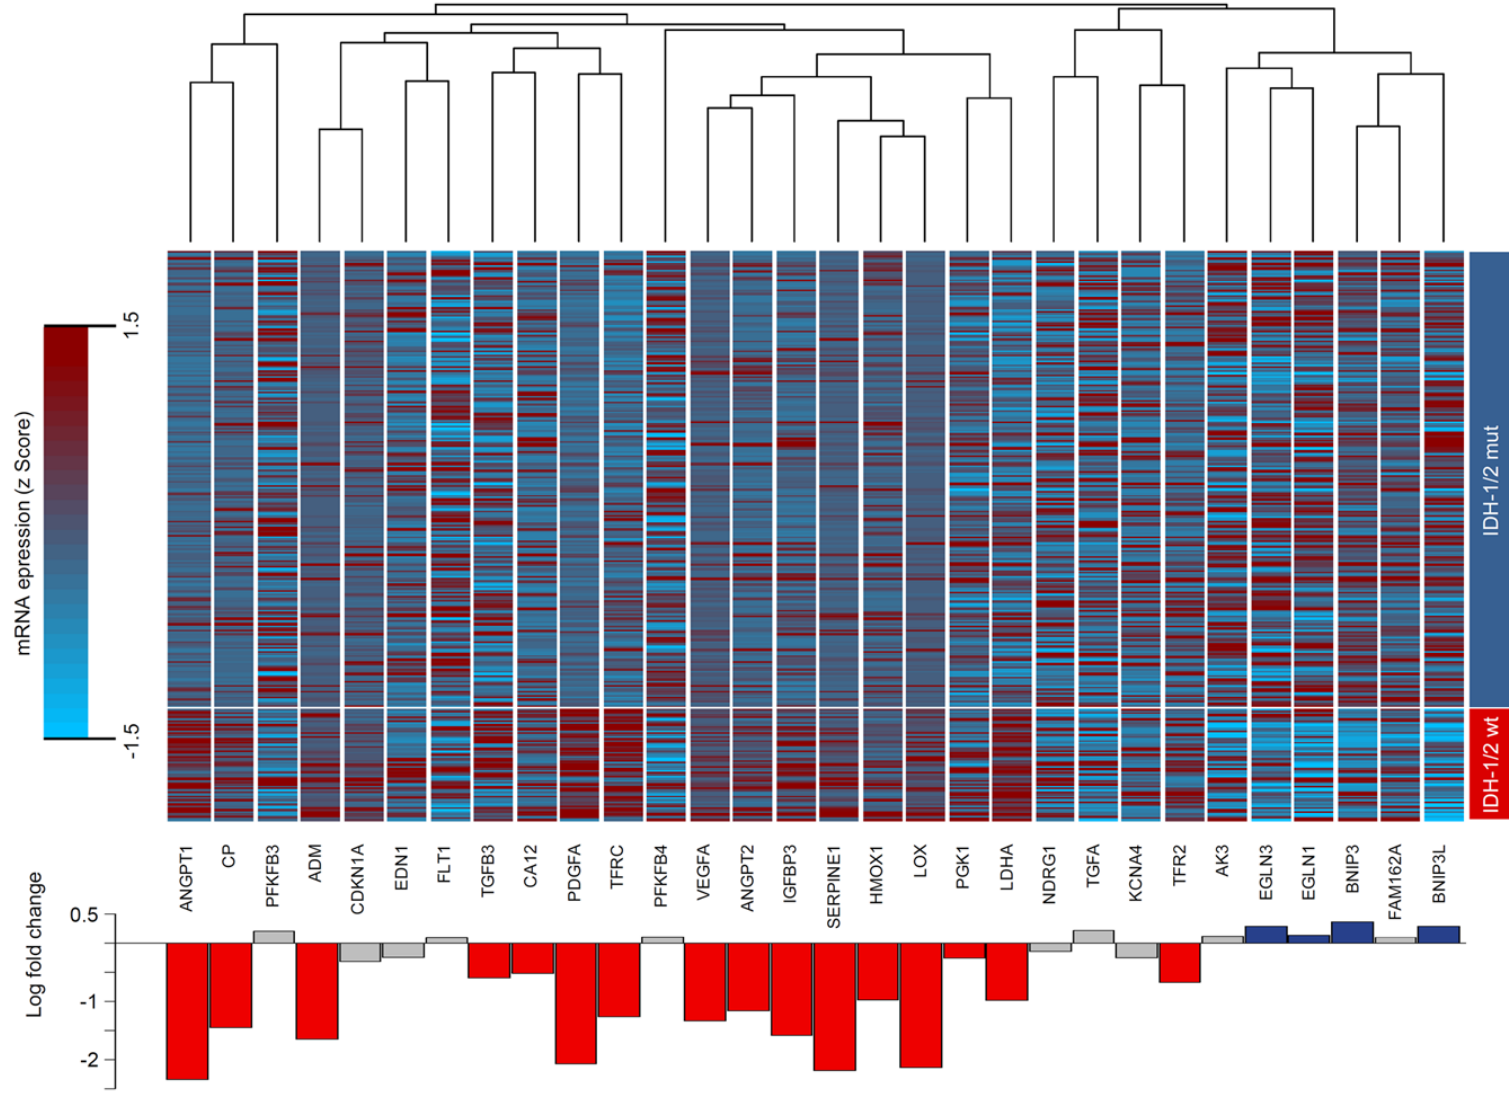

Supplement: srep16238-s1.pdf [file srep16238-s1.pdf]
